# Supplementary material for: Altered Synchronizations among Neural Networks in Geriatric Depression
Source: Hindawi journal article supplement (doi:10.1155/2015/343720), 2015-01-01

sFigure1

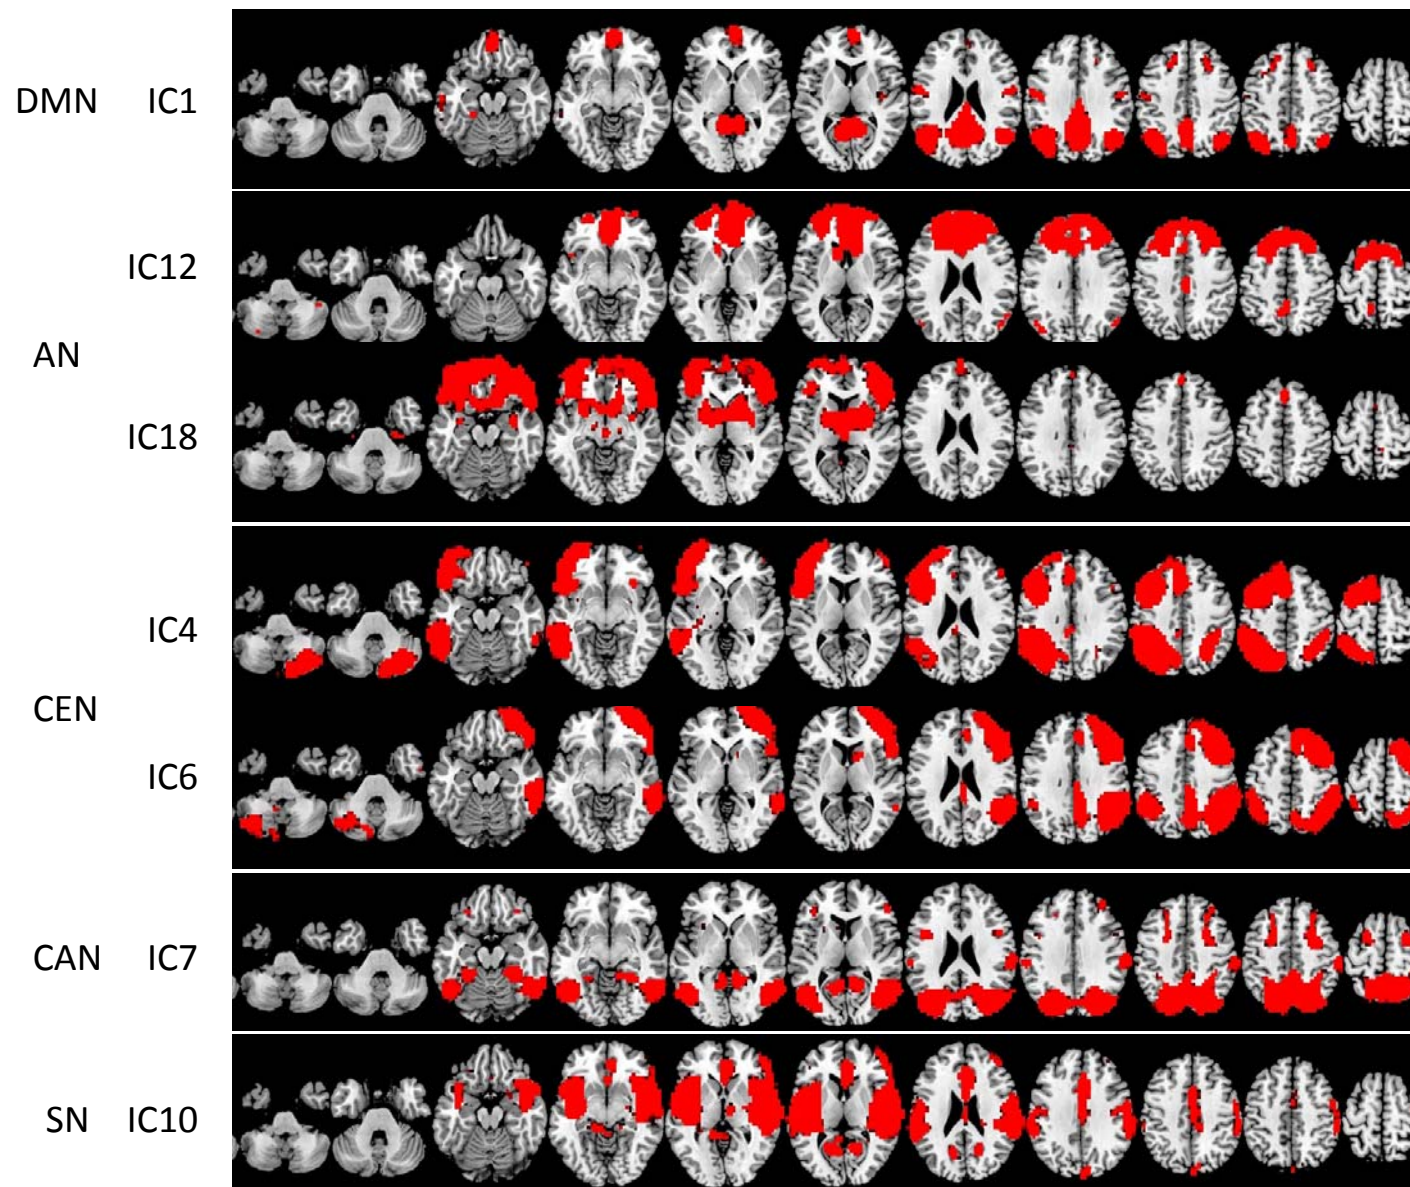

Supplement: f1 [file 343720.f1.pdf]
